# Supplementary material for: Coupled nanocomposite Co5.47N–Co3Fe7 inlaid in a tremella-like carbon framework as a highly efficient multifunctional electrocatalyst for oxygen transformation and overall water splitting
Source: Royal Society of Chemistry journal article supplement (doi:10.1039/c9se00657e), 2019-01-01
Supplement: c9se00657e1.pdf [file c9se00657e1.pdf]

## Supporting Information

### **Coupled nanocomposite $\text{Co}_{5.47}\text{N}-\text{Co}_3\text{Fe}_7$ inlaid in tremella-like carbon framework as highly efficient multifunctional electrocatalyst for oxygen transformation and overall water splitting**

Fantao Kong, Chaoqi Zhang, Yu Qiao, Ruijing Li, Aiguo Kong\* and Yongkui Shan\*

School of Chemistry and Molecular Engineering, East China Normal University, 500 Dong chuan Road, Shanghai 200241, P. R. China.

Corresponding Author: agkong@chem.ecnu.edu.cn, ykshan@chem.ecnu.edu.cn

#### CONTENTS

**Fig. S1.** Calibration to reversible hydrogen electrode (RHE) in 0.1 M KOH (A), 0.1 M  $\text{HClO}_4$  (B), 1 M KOH (C) and 0.5 M  $\text{H}_2\text{SO}_4$  (D) electrolytes.

**Fig. S2.** (A) The survey and (B) high-resolution N1s XPS spectra of the N-C-aerogel.

**Fig. S3.** HR-TEM images of the prepared  $\text{Co}_{5.47}\text{N}@-\text{Co}_3\text{Fe}_7/\text{N}-\text{C}-900$  with distinct border.

**Fig. S4.** TEM images of the  $\text{Co}_{5.47}\text{N}@-\text{Co}_3\text{Fe}_7/\text{N}-\text{C}-1000$ .

**Fig. S5.** (A)  $\text{C}_{1s}$  and (B)  $\text{O}_{1s}$  high-resolution XPS spectra of the  $\text{Co}_{5.47}\text{N}@-\text{Co}_3\text{Fe}_7/\text{N}-\text{C}-900$  along with the corresponding fitting curves.

**Fig. S6.** (A)  $\text{Fe}_{2p}$  XPS spectra of the Fe/N-C-900 and (B)  $\text{Co}_{2p}$  XPS spectra of the Co/N-C-900.

**Fig. S7.** CVs measured in 0.1 M KOH at scan rates from 5 to 30  $\text{mV S}^{-1}$  for N-C (A), Fe/N-C (B), Co/N-C (C) and  $\text{Co}_{5.47}\text{N}@-\text{Co}_3\text{Fe}_7/\text{N}-\text{C}-900$  (D).

**Fig. S8.** Comparison of the ECSA normalized current density of N-C-900, Co/N-C-900, Fe/N-C-900 and  $\text{Co}_{5.47}\text{N}@-\text{Co}_3\text{Fe}_7/\text{N}-\text{C}-900$  measured at 0.9 V vs. RHE in 0.1 M KOH electrolyte.

**Fig. S9.** The durability and methanol resistance of  $\text{Co}_{5.47}\text{N}@-\text{Co}_3\text{Fe}_7/\text{N}-\text{C}-900$  and Pt/C catalysts in

alkaline (A, B) and acidic (C, D) solutions.

**Fig. S10.** TEM images of  $\text{Co}_{5.47}\text{N}@Co_3\text{Fe}_7/\text{N-C-900}$  before (A) and after the stability test in acidic (B) and alkaline (C) electrolytes.

**Fig. S11.** XRD pattern of the  $\text{Co}_{5.47}\text{N}@Co_3\text{Fe}_7/\text{N-C-900}$  catalyst before and after ORR tests.

**Fig. S12.** The photograph of a light-emitting diode (LED, 3 V).

**Video S1.**  $\text{Co}_{5.47}\text{N}@Co_3\text{Fe}_7/\text{N-C-900}/\text{NF}||\text{Co}_{5.47}\text{N}@Co_3\text{Fe}_7/\text{N-C-900}/\text{NF}$  water electrolyzer at high current density. (AVI)

**Table S1.** The surface chemical compositions and relative content of different nitrogen species on N-C-aerogel and  $\text{Co}_{5.47}\text{N}@Co_3\text{Fe}_7/\text{N-C-900}$  from the XPS spectra.

**Table S2.** The surface composition of different catalysts and the relative content of Co-N and Fe-N moieties on Co/N-C-900, Fe/N-C-900 and  $\text{Co}_{5.47}\text{N}@Co_3\text{Fe}_7/\text{N-C-900}$  estimated from the XPS analysis.

**Table S3.** Comparison of ORR catalytic activity of  $\text{Co}_{5.47}\text{N}@Co_3\text{Fe}_7/\text{N-C-900}$  in alkaline solution with the recently reported non-precious electrocatalysts in the literature.

**Table S4.** Comparison of ORR catalytic activity of  $\text{Co}_{5.47}\text{N}@Co_3\text{Fe}_7/\text{N-C-900}$  in acidic solution with the recently reported non-precious electrocatalysts in the literature.

**Table S5.** Comparison of OER catalytic activity of  $\text{Co}_{5.47}\text{N}@Co_3\text{Fe}_7/\text{N-C-900}$  in alkaline solution with the recently reported non-precious electrocatalysts in the literature.

**Table S6.** Comparison of electrocatalytic activities of  $\text{Co}_{5.47}\text{N}@Co_3\text{Fe}_7/\text{N-C-900}$  with the recently reported catalysts for ORR and OER.

**Table S7.** Comparison of HER catalytic activity of  $\text{Co}_{5.47}\text{N}@Co_3\text{Fe}_7/\text{N-C-900}$  in acidic or alkaline solution with the recently reported non-precious electrocatalysts in the literature.

## **Experimental section**

**Chemicals.** All chemicals were purchased from Sinopharm Group Chemical Reagent Co., Ltd. and used without further purification.

### **Synthetic procedures**

**Synthesis of graphene oxides (GO).** Graphene oxides was prepared from natural graphite (Alfa Aesar) by using a modified Hummers method.<sup>S1</sup> In a typical synthesis process, 5 g of graphite flakes were added into a 250 mL round-bottomed flask, which containing a solution of concentrated 98% H<sub>2</sub>SO<sub>4</sub> (100 mL), P<sub>2</sub>O<sub>5</sub> (2.5 g) and K<sub>2</sub>S<sub>2</sub>O<sub>8</sub> (2.5 g). Then the mixture was heated to 80 °C and stirred for 6 h to complete the pre-oxidation of graphite. After cooling in air, the preoxidized graphite was filtered, washed with deionized water to remove the residual acid and then dried in vacuum overnight at room temperature. 5 g of the preoxidized graphite and 115 mL of 98% H<sub>2</sub>SO<sub>4</sub> were blended in a beaker in an ice-water bath. 15 g of KMnO<sub>4</sub> was added gradually to the above solution under vigorous stirring conditions below 10 °C, and after that, continue to stir for 2 h at 35 °C to complete the oxidation of graphite. 230 mL of deionized water was slowly added into the reaction mixture under vigorous stirring at approximately 100 °C. After the mixture was cooled to room temperature, and additional water (700 mL) and 30% H<sub>2</sub>O<sub>2</sub> (12.5 mL) were added into it to reduce the residual permanganate and manganese dioxide. The color of the mixture changed from dark-brown to bright yellow suspension. Finally, the graphene oxides (GO) were obtained by washing with diluted HCl (3%) solution three times and dialysis (dialysis membrane retained molecular weight: 8000-14000 Da) for a week to remove the residual salts and acids.

**Purification and oxidation of CNTs.** 500 mg of the commercially available multi-walled carbon nanotubes (CNT, 10-30 nm in diameter, 5-15 μm in length, purity 95 wt %) were calcined in a muffle furnace at 500 °C for 2 h in air to burn some of the impurities in the carbon nanotubes. The calcined

carbon nanotubes were treated with concentrated hydrochloric acid under the sonicating conditions for 6 h to remove the residual of metal impurities. The purified CNTs were obtained by filtering, washing with deionized water to remove the residual acid and drying in vacuum at 60 °C. In order to prepare the carbon nanotube oxide, 300 mg of purified CNTs were added in a mixture of H<sub>2</sub>SO<sub>4</sub>/HNO<sub>3</sub> (3:1, v/v) and held for 8 h at 80 °C. The nanotube oxides were harvested by washing with deionized water until the pH of filtrate was close to neutral and dispersed into deionized water to form a uniform suspension. The concentration of the obtained oxidized carbon nanotubes (o-CNTs) was 1 mg/mL.

**Synthesis of nitrogen-doped graphene/carbon nanotube aerogels (N-C-aerogel).** In a typical synthesis process, 25 mL of GO dispersion (2 mg/mL) was mixed with 40 mL of o-CNT solution (1 mg/mL) and sonicated for 30 min to form the suspension. 24 g of urea was added to the mixed suspension and continued ultrasound treatment for 3 h then which was transferred to a poly(tetrafluoroethylene) (Teflon)-lined autoclave (100 mL) and heated at 180 °C for 12 h. After cooling to room temperature, the resulting black suspension was filtered through a 0.22-mm microporous membrane. The solid on the filter was freeze-dried overnight to obtain N-C-aerogel.

**Assembly of the nitrogen-doped carbon embedding Co<sub>5,47</sub>N and Co<sub>3</sub>Fe<sub>7</sub> coupled nanoparticles (Co<sub>5,47</sub>N@Co<sub>3</sub>Fe<sub>7</sub>/N-Cs).** Briefly, 0.4 g ( $1.48 \times 10^{-3}$  mol) of iron(III) chloride hexahydrate (FeCl<sub>3</sub>•6H<sub>2</sub>O) and 0.4 g ( $1.68 \times 10^{-3}$  mol) of cobalt(II) chloride hexahydrate (CoCl<sub>2</sub>•6H<sub>2</sub>O) were dissolved in ethanol of 20 mL by continuous ultrasound to form a dark green solution, and then the prepared N-C-aerogels were dispersed into the ethanol solution by ultrasound. The solvent was slowly evaporated under constantly stirring at room temperature to obtain solid residues, which was heated to 900 °C in the tube furnace at a heating rate of 2 °C min<sup>-1</sup> and held for 4 hours with a flow of high-purity N<sub>2</sub> at same temperature. The resultant product was named nitrogen-doped carbon embedding

Co<sub>5.47</sub>N and Co<sub>3</sub>Fe<sub>7</sub> coupled nanoparticles (Co<sub>5.47</sub>N@Co<sub>3</sub>Fe<sub>7</sub>/N-C-900). For comparison, N-doped carbon (N-C-900), Fe-based N-doped carbon (Fe/N-C-900), Co-based N-doped carbon (Co/N-C-900) and Co<sub>5.47</sub>N@Co<sub>3</sub>Fe<sub>7</sub>/N-C-X (X: heat treatment temperature) materials were also obtained by the similar preparation procedure except the heat treatment temperature and the reactants.

**Characterization.** Wide-angle powder X-ray diffraction (XRD) patterns were performed on a D8 Advance X-ray diffractometer (Bruker AXS, Germany) with Cu K $\alpha$  radiation in the range from 10° to 80°. The surface morphology and composition of samples were characterized using a scanning electron microscope (Hitachi ST-4800 SEM). The microstructure of as-prepared samples were examined by using the transmission electron microscopy (TEM), elemental mapping and high-resolution TEM (HR-TEM) on a JEM-2010 instrument at an accelerating voltage of 200 kV. X-ray photoelectron spectroscopy (XPS) was performed using Axis Ultra DLD with Al K $\alpha$  radiation (15 kV, 150 W) and the C 1s peak at 284.6 eV as an internal standard. N<sub>2</sub> adsorption-desorption isotherm measurements were carried on a Micromeritics ASAP 2020 analyzer at 77 K, the specific surface area and pore size distribution were obtained by the Brunauer-Emmett-Teller (BET) and Barrett-Joyner-Halenda (BJH) methods, respectively. Raman spectra were performed by using a GX-PT-1500 (150) instrument with a 532 nm excitation laser (1mW).

**Electrode preparation and electrochemical measurement.** The electrochemical measurements were carried out by cyclic voltammetry (CV) and rotating disk electrode (RDE) techniques operated on a standard three-electrode system connected to a CHI-760C workstation and coupled with a rotating ring-disk electrode system (PINE, USA). A glassy carbon rotating disk electrode (5.6 mm in diameter, Pine) loading with various catalysts served as the working electrode, a Pt wire or graphite rod as a counter electrode, an Ag/AgCl electrode (KCl, 3 M) as the reference electrode. The catalyst ink were prepared by dispersing 10 mg of as-produced catalyst powder in a 1.28 mL ethanol solution

containing 30  $\mu\text{L}$  Nafion (5 wt %) to form a homogeneous suspension in an ultrasonic bath. Then, the catalyst ink was pipetted onto a polished glassy carbon electrode (GC) and dried under ambient conditions before use. Before measurement, the electrolytes were saturated by bubbling  $\text{N}_2$  or  $\text{O}_2$  for 30 min. All potentials were calibrated to a reversible hydrogen electrode (RHE) (Fig. S1).

The ORR measurements were conducted in  $\text{O}_2$ -saturated 0.1 M KOH or 0.1 M  $\text{HClO}_4$  solution at a scan rate of  $5 \text{ mV s}^{-1}$ . The polarization curves of ORR were corrected by subtracting the background double-layer current from the measured current in argon-saturated electrolytes. The catalysts loaded on the working electrode were approximately  $0.6 \text{ mg cm}^{-2}$  in alkaline electrolyte and  $0.8 \text{ mg cm}^{-2}$  in acidic electrolyte. The loading of Pt/C (JM) was  $0.1 \text{ mg cm}^{-2}$  in both electrolytes for comparison. The onset potential was defined as the electrode potential when ORR current density is  $3 \mu\text{A cm}^{-2}$  in rotating disk electrode (RDE) polarization curves, according to the reported method in the literature.<sup>S2,S3</sup> Electrochemical impedance spectroscopy (EIS) was measured under the potential holding of  $-0.182 \text{ V vs. Ag/AgCl}$  in  $\text{O}_2$ -saturated 0.1 M KOH solution in the frequency range of 1000 kHz to 0.01 Hz with an amplitude of 10 mV. Chronopotentiometry tests were performed to evaluate the stability and methanol resistance of the catalysts.

The numbers ( $n$ ) of charge transferred per oxygen molecule toward ORR process were calculated by Koutecky-Levich (K-L) equations:

$$\frac{1}{J} = \frac{1}{J_k} + \frac{1}{J_L} = \frac{1}{J_k} + \frac{1}{B\omega^{1/2}} \quad (1)$$

$$B = 0.62nFC_0D_0^{\frac{2}{3}}\nu^{-\frac{1}{6}} \quad (2)$$

$$J_k = nFkC_0 \quad (3)$$

where  $n$  is the overall number of electrons transferred in the ORR process,  $J$  is the measured current density,  $J_k$  is the kinetic current density,  $F$  is the Faradaic constant ( $F = 96485 \text{ C mol L}^{-1}$ ),  $C_0$  is the

bulk concentration of O<sub>2</sub> in the electrolyte, D<sub>0</sub> is the diffusion coefficient of O<sub>2</sub>,  $\nu$  is the kinematic viscosity of the electrolyte, and  $k$  is the electron transfer rate constant, and  $\omega$  is the rotating speed of the electrode in the form of revolutions per minute (rpm). According to Equation (1), the ORR kinetic current could be calculated based on Equation (4).

$$J_k = \frac{J \times J_L}{J_L - J} \quad (4)$$

Electrochemically active surface areas (EASAs) can be evaluated by the electrochemical double-layer capacitance ( $C_{dl}$ ). Cyclic voltammetry (CV) cycles at different scan rates of 5-30 mV s<sup>-1</sup> were conducted to measure the  $C_{dl}$  at non-faradaic overpotentials. A linear trend can be observed by plotting the difference value ( $\Delta J$ ) against the CV scan rate between the anodic and cathodic sweeps at a specific potential (1.03-1.13 V vs. RHE). The EASA can be calculated as:

$$EASA = C_{dl}/C_s \quad (5)$$

$C_s$  is the specific capacitance value for a flat standard with 1 cm<sup>2</sup> of real surface area. The general value for  $C_s$  is 40  $\mu\text{F}/\text{cm}^2$ .<sup>S4</sup>

For OER and HER, the measurements were performed in O<sub>2</sub>-saturated 1.0 M KOH and N<sub>2</sub>-saturated 0.5 M H<sub>2</sub>SO<sub>4</sub> solutions respectively, where graphite rod was employed as the counter electrode for HER test. The final loading for all catalysts on GC electrode was 0.6 mg cm<sup>-2</sup> in the OER and HER. The benchmark IrO<sub>2</sub> and Pt/C catalysts with the same mass loading as working electrode were utilized for investigation and comparison. The RDE tests were scanned at a scan rate of 5 mV s<sup>-1</sup> with a rotation speed of 1600 rpm. All LSV curve potentials of OER and HER were iR-corrected by electrochemical impedance spectroscopy.

For ORR, OER and HER, the kinetic performance of as-prepared catalysts can be evaluated by the Tafel slope ( $b$ ), which was obtained by fitting the linear part of the Tafel plots according to the Tafel equation ( $\eta = a + b \log(j)$ ).

**Zinc-air batteries assembly.** A homemade Zn-air battery in a two-electrode system was assembled by loading the  $\text{Co}_{5.47}\text{N}@\text{Co}_3\text{Fe}_7/\text{N-C}$  catalyst (with a loading of  $3 \text{ mg cm}^{-2}$ ) on a porous carbon cloth substrate as the air cathode. A polished Zn plate was utilized as the anode, and 6 M KOH with 0.2 M  $\text{Zn}(\text{Ac})_2$  mixed solution was applied as the electrolyte. The discharge polarization and power density plots were recorded using a galvanodynamic method. Charge/discharge cycling tests were performed on the LAND CT2001 instrument by 5 min charge step followed by 5 min discharge step with the same current density of  $20 \text{ mA cm}^{-2}$  for 24 h.

**Water spilliting system test.** Overall water spilliting was performed by a two-electrode configuration assembled by using  $\text{Co}_{5.47}\text{N}@\text{Co}_3\text{Fe}_7/\text{N-C-900}$  as both the anode and cathode material and tested in 1 M KOH solution. The catalyst ink was prepared according to the steps above. The prepared suspensions were then coated on a Ni foam (NF) substrate of  $\sim 1.0 \text{ cm}^2$  in area and dried under ambient conditions. The mass loading of catalysts was about  $4.5 \text{ mg cm}^{-2}$ . Before use, the nickel foam substrates were ultrasonically cleaned with 3 M HCl (38%) solution, ethanol and distilled water for a few minutes.



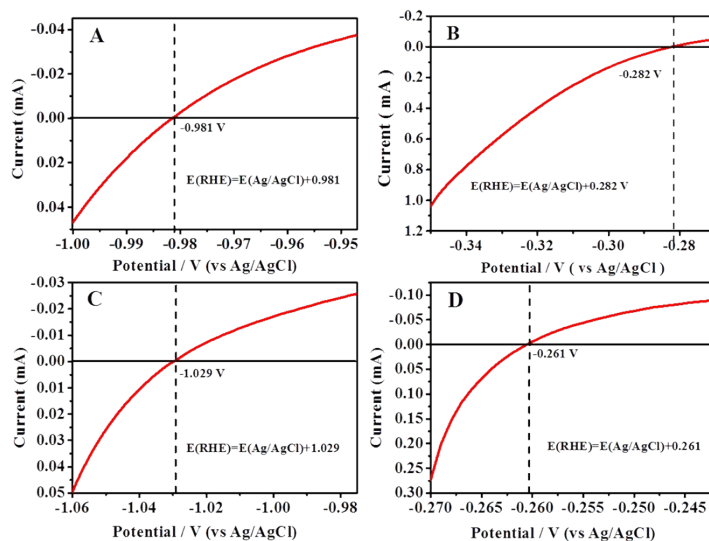

**Fig. S1.** Calibration to reversible hydrogen electrode (RHE) in 0.1 M KOH (A), 0.1 M HClO<sub>4</sub> (B), 1 M KOH (C) and 0.5 M H<sub>2</sub>SO<sub>4</sub> (D) electrolytes.

All the reported potentials in our paper were calibrated to the RHE potentials according to the reported method.<sup>S3</sup> The calibration was performed in a standard three-electrode system with platinum wires as the working and counter electrodes, and the Ag/AgCl electrode as the reference electrode. Linear scanning voltammetry (LSV) was then run at a scan rate of 5 mV s<sup>-1</sup>, and the potential at which the current crossed zero is taken to be the thermodynamic potential for the hydrogen electrode reactions (Fig. S1).

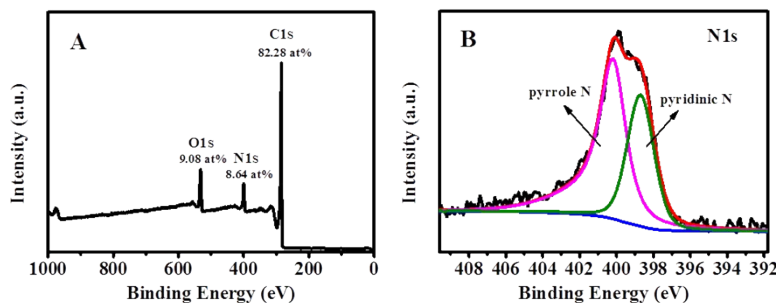

**Fig. S2.** The survey (A) and high-resolution N1s (B) XPS spectra of the N-C-aerogel.

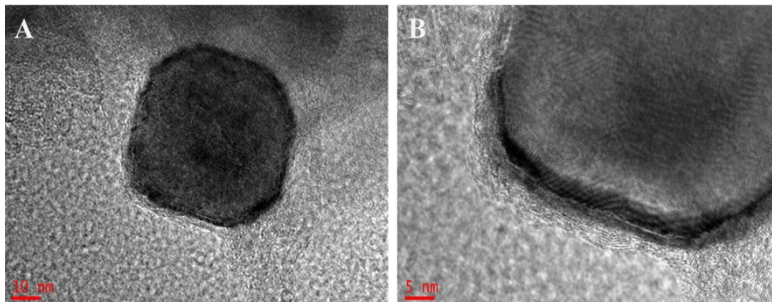

**Fig. S3.** TEM images of the prepared  $\text{Co}_{5.47}\text{N}@\text{Co}_3\text{Fe}_7/\text{N-C-900}$  with distinct border.

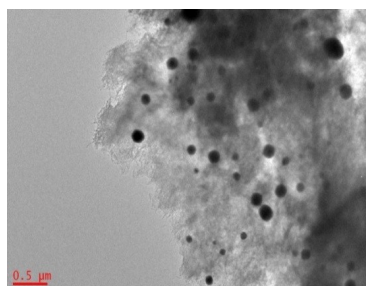

**Fig. S4.** TEM image of  $\text{Co}_{5.47}\text{N}@\text{Co}_3\text{Fe}_7/\text{N-C-1000}$ .

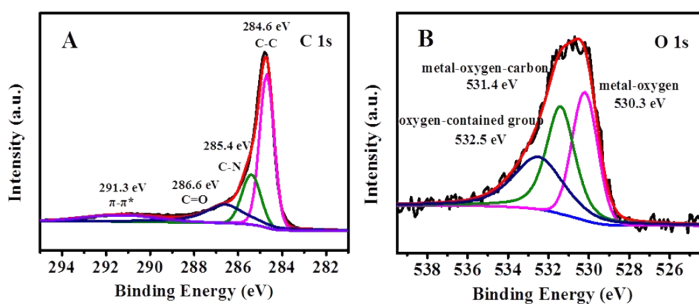

**Fig. S5.** (A)  $\text{C}_{1s}$  and (B)  $\text{O}_{1s}$  high-resolution XPS spectra of the  $\text{Co}_{5.47}\text{N}@\text{Co}_3\text{Fe}_7/\text{N-C-900}$  along with the corresponding fitting curves.

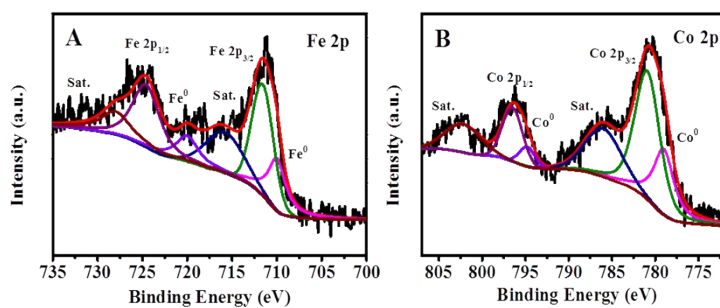

**Fig. S6.** (A)  $\text{Fe}_{2p}$  XPS spectra of the  $\text{Fe}/\text{N-C-900}$  and (B)  $\text{Co}_{2p}$  XPS spectra of the  $\text{Co}/\text{N-C-900}$ .

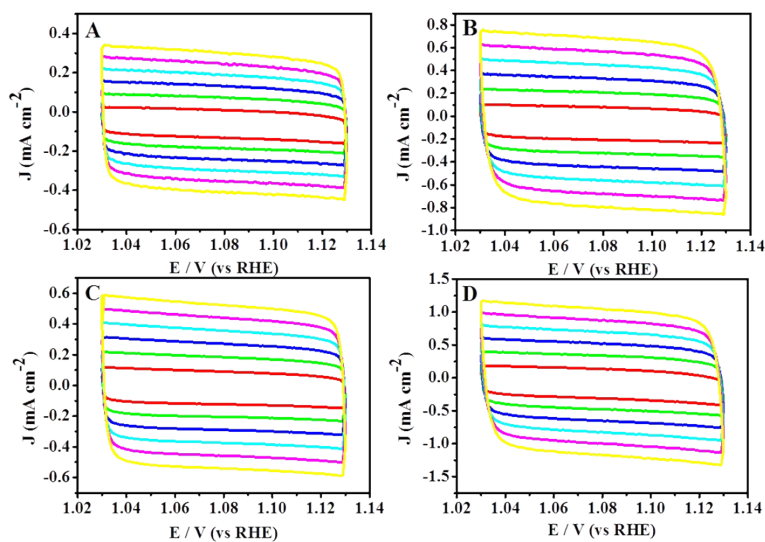

**Fig. S7.** CV curves of N-C (A), Fe/N-C (B), Co/N-C (C), and  $\text{Co}_{5.47}\text{N}@Co_3\text{Fe}_7/\text{N-C-900}$  (D) conducted in 0.1 M KOH at scan rates of 5 mV/s, 10 mV/s, 15 mV/s, 20 mV/s, 25 mV/s and 30 mV/s.

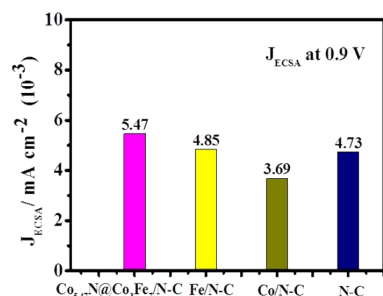

**Fig. S8.** Comparison of the ECSA normalized current density of N-C-900, Co/N-C-900, Fe/N-C-900 and  $\text{Co}_{5.47}\text{N}@Co_3\text{Fe}_7/\text{N-C-900}$  measured at 0.9 V vs. RHE in 0.1 M KOH electrolyte.

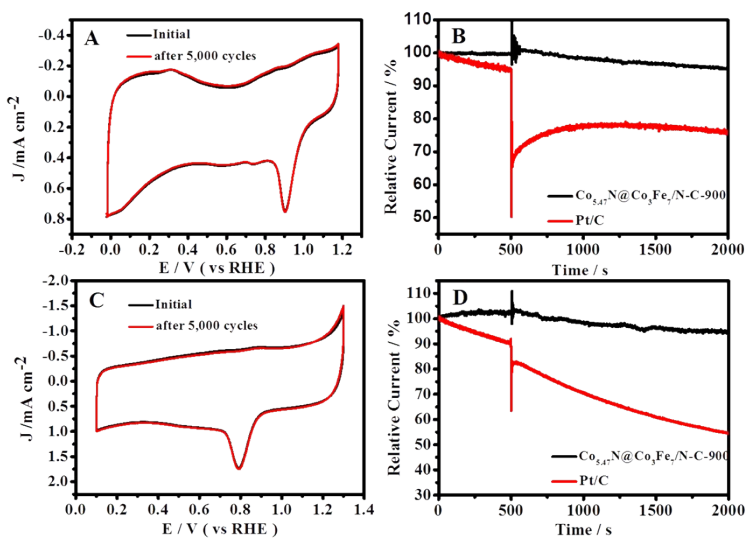

**Fig. S9.** CVs run for 5000 cycles of  $\text{Co}_{5.47}\text{N}@Co_3\text{Fe}_7/\text{N-C-900}$  recorded in  $\text{O}_2$ -saturated 0.1 M KOH (A) and 0.1 M  $\text{HClO}_4$  (C) solution. Current-time (i-t) chronoamperometric response of  $\text{Co}_{5.47}\text{N}@Co_3\text{Fe}_7/\text{N-C-900}$  and Pt/C-JM with the addition of methanol (3 wt %) in  $\text{O}_2$ -saturated 0.1 M KOH (B) and 0.1 M  $\text{HClO}_4$  (D) solution.

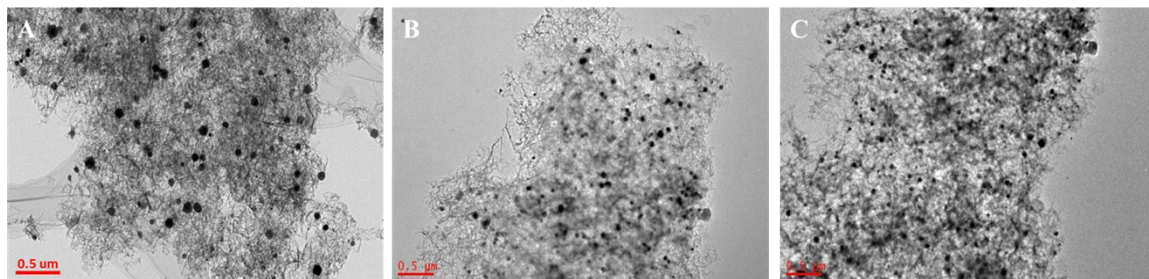

**Fig. S10.** TEM images of  $\text{Co}_{5.47}\text{N}@Co_3\text{Fe}_7/\text{N-C-900}$  before (A) and after the stability test in acidic (B) and alkaline (C) electrolytes.

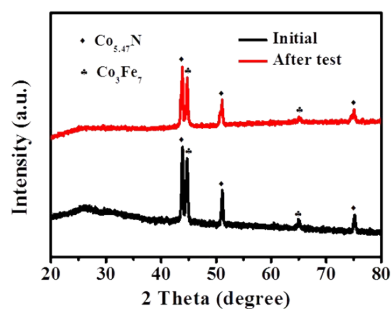

**Fig. S11.** XRD pattern of the  $\text{Co}_{5.47}\text{N}@Co_3\text{Fe}_7/\text{N-C-900}$  catalyst before and after ORR tests.

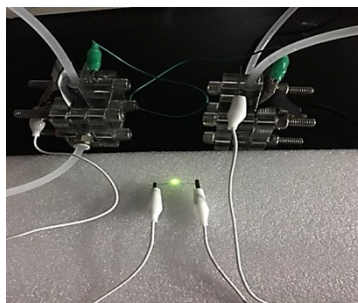

**Fig. S12.** Photograph of a light-emitting diode (LED, 3 V) powered by two batteries connected in series.

**Table S1.** The surface chemical compositions and relative content of different nitrogen species on N-C-aerogel and Co<sub>5.47</sub>N@Co<sub>3</sub>Fe<sub>7</sub>/N-C-900 from the XPS spectra.

| Samples                                                   | Element composition (at. %) |      |      |      |      | Relative content (%) |                  |       |      |                 |
|-----------------------------------------------------------|-----------------------------|------|------|------|------|----------------------|------------------|-------|------|-----------------|
|                                                           | C                           | N    | O    | Fe   | Co   | Py-N                 | M-N <sub>x</sub> | Pyr-N | G-N  | NO <sub>x</sub> |
| N-C-aerogel                                               | 78.46                       | 8.64 | 12.9 | —    | —    | 36.0                 | —                | 64.0  | —    | —               |
| Co <sub>5.47</sub> N@Co <sub>3</sub> Fe <sub>7</sub> /N-C | 88.91                       | 1.64 | 5.68 | 1.87 | 1.90 | 14.7                 | 49.5             | —     | 24.8 | 11.0            |

**Table S2.** The surface composition of different catalysts and the relative content of Co-N and Fe-N moieties on Co/N-C-900, Fe/N-C-900 and Co<sub>5.47</sub>N@Co<sub>3</sub>Fe<sub>7</sub>/N-C-900 estimated from the XPS analysis.

| Samples                                                       | Element composition (at. %) |      |      |      |      | Relative content (%) |      |
|---------------------------------------------------------------|-----------------------------|------|------|------|------|----------------------|------|
|                                                               | C                           | N    | O    | Co   | Fe   | Co-N                 | Fe-N |
| Co/N-C-900                                                    | 90.54                       | 2.85 | 4.30 | 2.31 | —    | 49.6                 | —    |
| Fe/N-C-900                                                    | 91.47                       | 2.55 | 3.82 | —    | 2.16 | —                    | 43.5 |
| Co <sub>5.47</sub> N@Co <sub>3</sub> Fe <sub>7</sub> /N-C-900 | 88.91                       | 1.64 | 5.68 | 1.90 | 1.87 | 52.0                 | 59.6 |

**Table S3.** Comparison of ORR catalytic activity of  $\text{Co}_{5.47}\text{N}@Co_3\text{Fe}_7/\text{N-C-900}$  in alkaline electrolyte with the recently reported non-precious electrocatalysts in the literature.

| Catalysts                                             | Loading<br>mg/cm <sup>2</sup> | Onset potential<br>( V vs. RHE) | Half-wave potential<br>( V vs. RHE) | Electrolyte | Ref       |
|-------------------------------------------------------|-------------------------------|---------------------------------|-------------------------------------|-------------|-----------|
| $\text{Co}_4\text{N}/\text{CNW}/\text{CC}$            | —                             | —                               | 0.80                                | 1.0 M KOH   | S6        |
| FeCo/C-800                                            | 0.20                          | 1.00                            | 0.85                                | 0.1 M KOH   | S7        |
| FeCo-OMPC                                             | 0.30                          | 1.00                            | 0.86                                | 0.1 M KOH   | S8        |
| N-GCNT/FeCo-3                                         | 0.20                          | 1.00                            | 0.92                                | 0.1 M KOH   | S9        |
| Fe-ISAs/CN                                            | 0.41                          | 0.986                           | 0.90                                | 0.1 M KOH   | S10       |
| $\text{Fe}_{0.3}\text{Co}_{0.7}/\text{NC}$            | 0.25                          | 0.98                            | 0.88                                | 0.1 M KOH   | S11       |
| FeCo- $\text{Co}_4\text{N}/\text{N-C}$                | 0.30                          | —                               | 0.76                                | 0.1 M KOH   | S12       |
| FeCo /NPC                                             | 0.485                         | —                               | 0.78                                | 0.1 M KOH   | S13       |
| FeCo @NC-800                                          | 0.42                          | 0.975                           | 0.88                                | 0.1 M KOH   | S14       |
| CoFe/N-GCT                                            | 0.60                          | 0.91                            | 0.79                                | 0.1 M KOH   | S15       |
| $\text{Co}_{1.08}\text{Fe}_{3.34}$                    | 0.20                          | 1.03                            | 0.92                                | 0.1 M KOH   | S16       |
| FeCo@N,S-CNT-800                                      | 0.20                          | 0.954                           | 0.838                               | 0.1 M KOH   | S17       |
| FeCo@MNC                                              | 0.36                          | —                               | 0.86                                | 0.1 M KOH   | S18       |
| meso/micro-FeCo-N <sub>x</sub>                        | 0.10                          | 0.954                           | 0.886                               | 0.1 M KOH   | S19       |
| FeCo@C MS                                             | 0.255                         | 1.04                            | 0.85                                | 0.1 M KOH   | S20       |
| DG@FeCo                                               | 0.16                          | 0.95                            | 0.816                               | 0.1 M KOH   | S21       |
| FeCNF-NP                                              | 0.60                          | 0.98                            | 0.88                                | 0.1 M KOH   | S22       |
| Fe-N <sub>4</sub> SAs/NPC                             | 0.51                          | 0.972                           | 0.885                               | 0.1 M KOH   | S23       |
| Pt/C-JM                                               | 0.10                          | 1.04                            | 0.85                                | 0.1 M KOH   | This work |
| $\text{Co}_{5.47}\text{N}@Co_3\text{Fe}_7/\text{N-C}$ | 0.60                          | 1.10                            | 0.94                                | 0.1 M KOH   | This work |

**Table S4.** Comparison of ORR catalytic activity of  $\text{Co}_{5.47}\text{N}@\text{Co}_3\text{Fe}_7/\text{N-C-900}$  in acidic electrolytes with the recently reported non-precious electrocatalysts in the literature.

| Catalysts                                                 | Loading<br>mg/cm <sup>2</sup> | Half-wave potential<br>( V vs. RHE) | Electrolyte                         | Ref.      |
|-----------------------------------------------------------|-------------------------------|-------------------------------------|-------------------------------------|-----------|
| FeCo/C-800                                                | 0.60                          | 0.75                                | 0.1M HClO <sub>4</sub>              | S7        |
| FeCo-OMPC                                                 | 0.60                          | 0.85                                | 0.1M HClO <sub>4</sub>              | S8        |
| Co <sub>1.08</sub> Fe <sub>3.34</sub>                     | 0.32                          | 0.78                                | 0.1M HClO <sub>4</sub>              | S16       |
| FeCo@C MS                                                 | 0.255                         | 0.60                                | 0.5M H <sub>2</sub> SO <sub>4</sub> | S20       |
| PANI-FeCo-C                                               | 0.60                          | 0.80                                | 0.5M H <sub>2</sub> SO <sub>4</sub> | S24       |
| FeMo-C/N-3                                                | 0.10                          | 0.67                                | 0.5M H <sub>2</sub> SO <sub>4</sub> | S25       |
| Fe/Co-CMP-800                                             | 0.60                          | 0.78                                | 0.5M H <sub>2</sub> SO <sub>4</sub> | S26       |
| VB <sub>12</sub> /silica colloid                          | 0.60                          | 0.79                                | 0.5M H <sub>2</sub> SO <sub>4</sub> | S27       |
| Fe <sub>3</sub> C/NG-800                                  | 0.40                          | 0.77                                | 0.1M HClO <sub>4</sub>              | S28       |
| CPANI-Fe-NaCl                                             | 0.60                          | 0.73                                | 0.1M HClO <sub>4</sub>              | S29       |
| Fe-N-C-3HT-2AL                                            | 0.80                          | 0.84                                | 0.1M HClO <sub>4</sub>              | S30       |
| PPy/FeTCPP/Co                                             | 0.30                          | 0.72                                | 0.1M HClO <sub>4</sub>              | S31       |
| Co@SACo-N-C-10                                            | 0.60                          | 0.78                                | 0.1M HClO <sub>4</sub>              | S32       |
| Pt-JM                                                     | 0.10                          | 0.80                                | 0.1M HClO <sub>4</sub>              | This work |
| Co <sub>5.47</sub> N@Co <sub>3</sub> Fe <sub>7</sub> /N-C | 0.81                          | 0.80                                | 0.1M HClO <sub>4</sub>              | This work |

**Table S5.** Comparison of OER catalytic activity of  $\text{Co}_{5.47}\text{N}@Co_3\text{Fe}_7/\text{N-C-900}$  in alkaline electrolytes with the recently reported non-precious electrocatalysts in the literature.

| Catalysts                                             | Loading<br>mg/cm <sup>2</sup> | Overpotential at<br>10 mA cm <sup>-2</sup><br>(mV vs. RHE) | Tafel slope<br>(mV dec <sup>-1</sup> ) | Electrolyte | Ref.      |
|-------------------------------------------------------|-------------------------------|------------------------------------------------------------|----------------------------------------|-------------|-----------|
| $\text{Co}_4\text{N}/\text{CNW}/\text{CC}$            | —                             | 310                                                        | 81                                     | 1.0 M KOH   | S6        |
| N-GCNT/FeCo-3                                         | 0.2                           | 500                                                        | 99.5                                   | 0.1 M KOH   | S9        |
| FeCo/NPC                                              | 0.485                         | 440                                                        | 85                                     | 0.1 M KOH   | S13       |
| CoFe/N-GCT                                            | 0.6                           | 440                                                        | 106                                    | 0.1 M KOH   | S15       |
| FeCo@MNC                                              | 0.36                          | 240                                                        | 60                                     | 1.0 M KOH   | S17       |
| meso/micro-FeCo-Nx                                    | 0.10                          | 370                                                        | 57                                     | 1.0 M KOH   | S19       |
| FeCo@C MS                                             | 0.255                         | 440                                                        | —                                      | 0.1 M KOH   | S20       |
| Fe-N <sub>4</sub> SAs/NPC                             | 0.51                          | 430                                                        | 95                                     | 1.0 M KOH   | S23       |
| Co <sub>3</sub> Fe <sub>7</sub> Ni-2                  | 0.32                          | 325                                                        | 60                                     | 1.0 M KOH   | S33       |
| Co <sub>0.75</sub> Fe <sub>0.25</sub> -NC             | 0.212                         | 303                                                        | 30                                     | 1.0 M KOH   | S34       |
| FeCo@NG/NCNT                                          | 0.14                          | 450                                                        | 77                                     | 1.0 M KOH   | S35       |
| Fe <sub>0.5</sub> Co <sub>0.5</sub> @NC/NCNS          | 0.306                         | 270                                                        | 50                                     | 1.0 M KOH   | S36       |
| FeCoOOH/NF                                            | —                             | 211                                                        | 33                                     | 1.0 M KOH   | S37       |
| Ni <sub>2</sub> P/CoN-PCP                             | 0.26                          | 270                                                        | 65                                     | 1.0 M KOH   | S38       |
| Fe <sub>2</sub> N/S/N                                 | 0.4                           | 360                                                        | 57                                     | 1.0 M KOH   | S39       |
| FeNi <sub>3</sub> N/NG                                | 0.1                           | 258                                                        | 85                                     | 1.0 M KOH   | S40       |
| Fe/P/C <sub>0.5</sub> -800                            | 0.46                          | 330                                                        | 67                                     | 1.0 M KOH   | S41       |
| IrO <sub>2</sub>                                      | 0.45                          | 320                                                        | 63                                     | 1.0 M KOH   | This work |
| $\text{Co}_{5.47}\text{N}@Co_3\text{Fe}_7/\text{N-C}$ | 0.6                           | 310                                                        | 69                                     | 1.0 M KOH   | This work |



**Table S6.** Comparison of electrocatalytic activities of  $\text{Co}_{5.47}\text{N@Co}_3\text{Fe}_7/\text{N-C-900}$  with the recently reported catalysts for ORR and OER.

| Catalyst                                              | $E_{1/2}$ (V vs. RHE) | $E_{j=10}$ (V vs. RHE) | $\Delta E$ (V) | Loading (mg cm <sup>-2</sup> ) | Electrolytes | Ref.      |
|-------------------------------------------------------|-----------------------|------------------------|----------------|--------------------------------|--------------|-----------|
| $\text{Co}_4\text{N/CNW/CC}$                          | 0.80                  | 1.54                   | 0.74           | —                              | 1 M KOH      | S6        |
| N-GCNT/FeCo-3                                         | 0.92                  | 1.73                   | 0.81           | 0.2                            | 0.1 M KOH    | S9        |
| CoFe/N-GCT                                            | 0.79                  | 1.67                   | 0.88           | 0.6                            | 0.1 M KOH    | S15       |
| Co/NC                                                 | 0.83                  | 1.69                   | 0.86           | 0.21                           | 0.1 M KOH    | S42       |
| Fe@N-C 700                                            | 0.83                  | 1.71                   | 0.88           | 0.31                           | 0.1 M KOH    | S43       |
| CoFe@NCNTs                                            | 0.84                  | 1.68                   | 0.84           | 0.8                            | 0.1 M KOH    | S44       |
| $\text{Co}_3\text{O}_4/\text{NBGHS}$                  | 0.86                  | 1.71                   | 0.85           | —                              | 0.1 M KOH    | S45       |
| NCNF-1000                                             | 0.82                  | 1.84                   | 1.02           | 0.1                            | 0.1 M KOH    | S46       |
| NCN-1000-5                                            | 0.82                  | 1.61                   | 0.81           | 0.2                            | 0.1 M KOH    | S47       |
| $\text{CoFe}_2\text{O}_4/\text{bicarbon}$             | 0.70                  | 1.65                   | 0.95           | 0.503                          | 0.1 M KOH    | S48       |
| $\text{NiCo}_2\text{S}_4/\text{N-CNT}$                | 0.8                   | 1.60                   | 0.8            | 0.248                          | 0.1 M KOH    | S49       |
| $\text{IrO}_2$                                        | 0.27                  | 1.67                   | 1.4            | 0.45                           | 0.1 M KOH    | This work |
| Pt/C                                                  | 0.84                  | 1.97                   | 1.13           | 0.1                            | 0.1 M KOH    | This work |
| $\text{Co}_{5.47}\text{N@Co}_3\text{Fe}_7/\text{N-C}$ | 0.94                  | 1.72                   | 0.78           | 0.6                            | 0.1 M KOH    | This work |

**Table S7.** Comparison of HER catalytic activity of  $\text{Co}_{5.47}\text{N}@\text{Co}_3\text{Fe}_7/\text{N-C-900}$  with the recently reported non-precious electrocatalysts in the literature.

| Catalysts                                                            | Loading<br>mg/cm <sup>2</sup> | Overpotential at<br>10 mA cm <sup>-2</sup><br>(mV vs. RHE) | Tafel slope<br>(mV dec <sup>-1</sup> ) | Electrolytes                         | Ref.      |
|----------------------------------------------------------------------|-------------------------------|------------------------------------------------------------|----------------------------------------|--------------------------------------|-----------|
| FeCo/NPC                                                             | 0.6                           | 340                                                        | 125                                    | 1.0 M KOH                            | S14       |
| FeCo@C MS                                                            | 0.255                         | 220                                                        | 65                                     | 0.5 M H <sub>2</sub> SO <sub>4</sub> | S21       |
| FeCo                                                                 | 0.32                          | 211                                                        | 77                                     | 1.0 M KOH                            | S33       |
| Co <sub>0.75</sub> Fe <sub>0.25</sub> -NC                            | 0.212                         | 202                                                        | 68                                     | 1.0 M KOH                            | S34       |
| FeCo@NG/NCNT                                                         | 0.14                          | 332                                                        | 110                                    | 0.5 M H <sub>2</sub> SO <sub>4</sub> | S35       |
| Ni <sub>2</sub> P/CoN-PCP                                            | 0.26                          | 94                                                         | 41                                     | 1.0 M KOH                            | S38       |
| FeNi <sub>3</sub> N/NG                                               | 0.1                           | 186                                                        | 83                                     | 1.0 M KOH                            | S39       |
| Co <sub>3</sub> O <sub>4</sub> /NCMTs                                | 1.0                           | 210                                                        | —                                      | 1.0 M KOH                            | S40       |
| Co@N-CNTF                                                            | 0.28                          | 220                                                        | —                                      | 1.0 M KOH                            | S41       |
| FeCo@N-C                                                             | 0.6                           | 230                                                        | 92                                     | 0.5 M H <sub>2</sub> SO <sub>4</sub> | S50       |
| FeCo@N-C/KB                                                          | 0.6                           | 240                                                        | 97                                     | 0.5 M H <sub>2</sub> SO <sub>4</sub> | S50       |
| FeCo@NCNTs-NH                                                        | 0.32                          | 276                                                        | 74                                     | 0.1 M H <sub>2</sub> SO <sub>4</sub> | S51       |
| Co <sub>2</sub> P/CoN-NCNT                                           | 0.2                           | 98                                                         | 57                                     | 0.5 M H <sub>2</sub> SO <sub>4</sub> | S52       |
| (Fe <sub>0.75</sub> Co <sub>0.25</sub> ) <sub>5</sub> C <sub>2</sub> | 0.71                          | 174                                                        | —                                      | 0.1 M KOH                            | S53       |
| (Ni,Co)S <sub>2</sub>                                                | —                             | 180                                                        | 68                                     | 0.1 M KOH                            | S54       |
| Co/CoP-HNC                                                           | 0.19                          | 181                                                        | 104                                    | 1.0 M KOH                            | S55       |
| Pt/C                                                                 | 0.6                           | 30                                                         | 45                                     | 0.5 M H <sub>2</sub> SO <sub>4</sub> | This work |
| Co <sub>5.47</sub> N@Co <sub>3</sub> Fe <sub>7</sub> /N-C            | 0.6                           | 115                                                        | 68                                     | 0.5 M H <sub>2</sub> SO <sub>4</sub> | This work |
| Co <sub>5.47</sub> N@Co <sub>3</sub> Fe <sub>7</sub> /N-C            | 0.6                           | 181                                                        | 112                                    | 1.0 M KOH                            | This work |

## References

- [S1] W. S. Hummers Jr and R. E. Offeman, *J. Am. Chem. Soc.*, 1958, **80**, 1339-1339.
- [S2] M. Chokai, M. Taniguchi, S. Moriya, K. Matsubayashi, T. Shinoda, Y. Nabaie, S. Kuroki, T. Hayakawa, M.-a. Kakimoto and J.-i. Ozaki, *J. Power Sour.*, 2010, **195**, 5947-5951.
- [S3] A. Kong, X. Zhu, Z. Han, Y. Yu, Y. Zhang, B. Dong and Y. Shan, *ACS Catal.*, 2014, **4**, 1793-1800.
- [S4] P. Li, H. Jang, B. Yuan, Z. Wu, X. Liu and J. Cho, *Inorg. Chem. Front.*, 2019, **6**, 417-422.
- [S5] Y. Liang, Y. Li, H. Wang, J. Zhou, J. Wang, T. Regier and H. Dai, *Nat. Mater.*, 2011, **10**, 780.
- [S6] F. Meng, H. Zhong, D. Bao, J. Yan and X. Zhang, *J. Am. Chem. Soc.*, 2016, **138**, 10226-10231.
- [S7] Q. Lin, X. Bu, A. Kong, C. Mao, F. Bu and P. Feng, *Adv. Mater.*, 2015, **27**, 3431-3436.
- [S8] J. Y. Cheon, T. Kim, Y. Choi, H. Y. Jeong, M. G. Kim, Y. J. Sa, J. Kim, Z. Lee, T.-H. Yang and K. Kwon, *Sci. Rep.*, 2013, **3**, 2715.
- [S9] C. Y. Su, H. Cheng, W. Li, Z. Q. Liu, N. Li, Z. Hou, F. Q. Bai, H. X. Zhang and T. Y. Ma, *Adv. Energy Mater.*, 2017, **7**, 1602420.
- [S10] Y. Chen, S. Ji, Y. Wang, J. Dong, W. Chen, Z. Li, R. Shen, L. Zheng, Z. Zhuang and D. Wang, *Angew. Chem. Int. Ed.*, 2017, **56**, 6937-6941.
- [S11] B. Y. Guan, Y. Lu, Y. Wang, M. Wu and X. W. Lou, *Adv. Funct. Mater.*, 2018, **28**, 1706738.
- [S12] X. Zhu, T. Jin, C. Tian, C. Lu, X. Liu, M. Zeng, X. Zhuang, S. Yang, L. He and H. Liu, *Adv. Mater.*, 2017, **29**, 1704091.
- [S13] H. X. Zhong, J. Wang, Q. Zhang, F. Meng, D. Bao, T. Liu, X. Y. Yang, Z. W. Chang, J. M. Yan and X. B. Zhang, *Adv. Sustainable Syst.*, 2017, **1**, 1700020.
- [S14] J. Tong, W. Wang, Q. Li, F. Liu, W. Ma, W. Li, B. Su, Z. Lei and L. Bo, *Electrochim. Acta*, 2017, **248**, 388-396.

- [S15] X. Liu, L. Wang, P. Yu, C. Tian, F. Sun, J. Ma, W. Li and H. Fu, *Angew. Chem. Int. Ed.*, 2018, **130**, 16398-16402.
- [S16] S. Sultan, J. N. Tiwari, J. H. Jang, A. M. Harzandi, F. Salehnia, S. J. Yoo and K. S. Kim, *Adv. Energy Mater.*, 2018, **8**, 1801002.
- [S17] D. Zhao, L. Li, L. Xie, N. Zhou and S. Chen, *J. Alloys Compd.*, 2018, **741**, 368-376.
- [S18] C. Li, M. Wu and R. Liu, *Appl. Catal. B: Environ.*, 2019, **244**, 150-158.
- [S19] S. Li, C. Cheng, X. Zhao, J. Schmidt and A. Thomas, *Angew. Chem. Int. Ed.*, 2018, **57**, 1856-1862.
- [S20] W. Zang, A. Sumboja, Y. Ma, H. Zhang, Y. Wu, S. Wu, H. Wu, Z. Liu, C. Guan and J. Wang, *ACS Catal.*, 2018, **8**, 8961-8969.
- [S21] X. Yan, Y. Jia, L. Zhang, M. T. Soo and X. Yao, *Chem. Commun.*, 2017, **53**, 12140-12143.
- [S22] M. Wang, C. Zhang, T. Meng, Z. Pu, H. Jin, D. He, J. Zhang and S. Mu, *J. Power Source*, 2019, **413**, 367-375.
- [S23] Y. Pan, S. Liu, K. Sun, X. Chen, B. Wang, K. Wu, X. Cao, W. C. Cheong, R. Shen and A. Han, *Angew. Chem. Int. Ed.*, 2018, **57**, 8614-8618.
- [S24] G. Wu, K. L. More, C. M. Johnston and P. Zelenay, *Science*, 2011, **332**, 443-447.
- [S25] L. Lin, Z. K. Yang, Y.-F. Jiang and A.-W. Xu, *ACS Catal.*, 2016, **6**, 4449-4454.
- [S26] J. Yang, H. Guo, S. Chen, Y. Li, C. Cai, P. Gao, L. Wang, Y. Zhang, R. Sun and X. Niu, *J. Mater. Chem. A*, 2018, **6**, 13859-13866.
- [S27] H.-W. Liang, W. Wei, Z.-S. Wu, X. Feng and K. Müllen, *J. Am. Chem. Soc.*, 2013, **135**, 16002-16005.
- [S28] M. Xiao, J. Zhu, L. Feng, C. Liu and W. Xing, *Adv. Mater.*, 2015, **27**, 2521-2527.
- [S29] W. Ding, L. Li, K. Xiong, Y. Wang, W. Li, Y. Nie, S. Chen, X. Qi and Z. Wei, *J. Am. Chem.*

*Soc.*, 2015, **137**, 5414-5420.

[S30] N. R. Sahraie, U. I. Kramm, J. Steinberg, Y. Zhang, A. Thomas, T. Reier, J.-P. Paraknowitsch and P. Strasser, *Nat. Commun.* 2015, **6**, 8618.

[S31] J. Yang, X. Wang, B. Li, L. Ma, L. Shi, Y. Xiong and H. Xu, *Adv. Funct. Mater.*, 2017, **27**, 1606497.

[S32] Q. Cheng, S. Han, K. Mao, C. Chen, L. Yang, Z. Zou, M. Gu, Z. Hu and H. Yang, *Nano Energy*, 2018, **52**, 485-493.

[S33] Y. Yang, Z. Lin, S. Gao, J. Su, Z. Lun, G. Xia, J. Chen, R. Zhang and Q. Chen, *ACS Catal.*, 2016, **7**, 469-479.

[S34] X. Feng, X. Bo and L. Guo, *J. Power Sources*, 2018, **389**, 249-259.

[S35] B. Du, Q.-T. Meng, J.-Q. Sha and J.-S. Li, *New J. Chem.*, 2018, **42**, 3409-3414.

[S36] M. Li, T. Liu, X. Bo, M. Zhou and L. Guo, *J. Mater. Chem. A*, 2017, **5**, 5413-5425.

[S37] T. T. H. Nguyen, J. Lee, J. Bae and B. Lim, *Chem. -Eur. J.*, 2018, **24**, 4724-4728.

[S38] T. Sun, S. Zhang, L. Xu, D. Wang and Y. Li, *Chem Commun*, 2018, **54**, 12101-12104.

[S39] A. Mahmood, H. Tabassum, R. Zhao, W. Guo, W. Aftab, Z. Liang, Z. Sun and R. Zou, *Small*, 2018, **14**, 1803500.

[S40] L. Liu, F. Yan, K. Li, C. Zhu, Y. Xie, X. Zhang and Y. Chen, *J. Mater. Chem. A*, 2019, **7**, 1083-1091.

[S41] M. Li, T. Liu, X. Bo, M. Zhou, L. Guo and S. Guo, *Nano Energy*, 2017, **33**, 221-228.

[S42] A. Aijaz, J. Masa, C. Rösler, W. Xia, P. Weide, A. J. Botz, R. A. Fischer, W. Schuhmann and M. Muhler, *Angew. Chem. Int. Ed.*, 2016, **55**, 4087-4091.

[S43] J. Wang, H. Wu, D. Gao, S. Miao, G. Wang and X. Bao, *Nano Energy*, 2015, **13**, 387-396.

[S44] P. Cai, Y. Hong, S. Ci and Z. Wen, *Nanoscale*, 2016, **8**, 20048-20055.

- [S45] Z. Jiang, Z.-J. Jiang, T. Maiyalagan and A. Manthiram, *J. Mater. Chem. A*, 2016, **4**, 5877-5889.
- [S46] Q. Liu, Y. Wang, L. Dai and J. Yao, *Adv. Mater.*, 2016, **28**, 3000-3006.
- [S47] H. Jiang, J. Gu, X. Zheng, M. Liu, X. Qiu, L. Wang, W. Li, Z. Chen, X. Ji and J. Li, *Energy Environ. Sci.*, 2019, **12**, 322-333.
- [S48] S. Liu, W. Bian, Z. Yang, J. Tian, C. Jin, M. Shen, Z. Zhou and R. Yang, *J. Mater. Chem. A*, 2014, **2**, 18012-18017.
- [S49] X. Han, X. Wu, C. Zhong, Y. Deng, N. Zhao and W. Hu, *Nano Energy*, 2017, **31**, 541-550.
- [S50] S. H. Noh, M. H. Seo, J. Kang, T. Okajima, B. Han and T. Ohsaka, *NPG Asia Mater.*, 2016, **8**, e312.
- [S51] J. Deng, P. Ren, D. Deng, L. Yu, F. Yang and X. Bao, *Energy Environ. Sci.*, 2014, **7**, 1919-1923.
- [S52] Y. Guo, P. Yuan, J. Zhang, H. Xia, F. Cheng, M. Zhou, J. Li, Y. Qiao, S. Mu and Q. Xu, *Adv. Funct. Mater.*, 2018, **28**, 1805641.
- [S53] S. Li, P. Ren, C. Yang, X. Liu, Z. Yin, W. Li, H. Yang, J. Li, X. Wang and Y. Wang, *Sci. Bull.*, 2018, **63**, 1358-1363.
- [S54] J. Zhang, X. Bai, T. Wang, W. Xiao, P. Xi, J. Wang, D. Gao and J. Wang, *Nano-Micro Lett.*, 2019, **11**, 2.
- [S55] Y. Hao, Y. Xu, W. Liu and X. Sun, *Mater. Horiz.*, 2018, **5**, 108-115.
